# Supplementary material for: Analysis of the Peptidoglycan Hydrolase Complement of Lactobacillus casei and Characterization of the Major γ-D-Glutamyl-L-Lysyl-Endopeptidase
Source: PubMed Central journal article supplement (PMC3288076; doi:10.1371/journal.pone.0032301), 2012-02-27
Supplement: pone.0032301.s009.pdf [file pone.0032301.s009.pdf]

**Table S4** : Primers used for RT-PCR experiments.

| <b>Primer name</b> | <b>Locus tag</b>  | <b>Sequence</b>                 |
|--------------------|-------------------|---------------------------------|
| LcTuf-F            | LCABL_15580 (tuf) | 5'- TTCCTGTTATCCGTGGTTCTG -3'   |
| LcTuf-R            | LCABL_15580 (tuf) | 5'- AATCACACCCGGTAACATCAGTG -3' |
| LcLys-F            | LCABL_11280       | 5'- CCACACTAGTGATCCCGAAAC -3'   |
| LcLys-R            | LCABL_11280       | 5'- TCTGGACTCCATCAATCACTTC -3'  |
| LcAcmA-F           | LCABL_12760       | 5'- CGTTAAAAATAATTCCGCTTGC -3'  |
| LcAcmA-R           | LCABL_12760       | 5'- AGTAGCATAGCCATCCGTCTTC -3'  |
| LcAmi-F            | LCABL_17510       | 5'- GGTTAATCAACCGGTTAACGTC -3'  |
| LcAmi-R            | LCABL_17510       | 5'- TTTTTCATAGTCGGTGCCATC -3'   |
| Lc230-F            | LCABL_00230       | 5'- TTGGTTGCTGCAGTTACCTTAG -3'  |
| Lc230-R            | LCABL_00230       | 5'- GATTTCTGGGTTTCCAATGAAG -3'  |
| Lc2770-F           | LCABL_02770       | 5'- GATGTTGCTGTCTCCAGTGC -3'    |
| Lc2770-R           | LCABL_02770       | 5'- GCCGTTCAAAAAGGCATAATAC -3'  |
| LcTrsG-F           | LCABL_05960       | 5'- ACTTAGCAAACGTTGGTTGTTG -3'  |
| LcTrsG-R           | LCABL_05960       | 5'- CTGGCATCTGCTCCAAATTC -3'    |
| LcLcP45-F          | LCABL_21960       | 5'- TATGAGCCAAGCGTACTTTGAG -3'  |
| LcLcP45-R          | LCABL_21960       | 5'- CACTTGTTGCGACAAAGAGC -3'    |
| LcAtlh-F           | LCABL_04610       | 5'- TTACGCGCATTATCACAACAG -3'   |
| LcAtlh-R           | LCABL_04610       | 5'- ATCACACTCAAAATCGTCTTGC -3'  |
| LcPs356-F          | LCABL_13470       | 5'- GCGAAGTATCAGGGAGCAAG -3'    |
| LcPs356-R          | LCABL_13470       | 5'- TGCCAAATAGCTACCCCATC -3'    |
| LcIsIA-F           | LCABL_02350       | 5'- TTTGCGAACACTTTGGACAG -3'    |
| LcIsIA-R           | LCABL_02350       | 5'- TCGTCGTTGCTTGTGTAATC -3'    |
| LcLysozyme-F       | LCABL_12360       | 5'- CAGTCGGGTCATTTATGCTG -3'    |
| LcLysozyme-R       | LCABL_12360       | 5'- TACCCATCAGCAACACTTGG -3'    |
| LcLys2-F           | LCABL_10020       | 5'- GCACGTTGGTATCATTACG -3'     |
| LcLys2-R           | LCABL_10020       | 5'- TGTGTGCGGTAATAGGCTTG -3'    |
